# Supplementary material
Source: Springer Nature journal article supplement (https://www.springermedizin.de/resource/supplementary/12884_2013_883_MOESM1_ESM.pdf/9458424)
Supplement: MOESM1 [file 9458424]

## **Appendix 1 The Client Satisfaction Questionnaire (CSQ-8) for childbirth-related care**

### **1. How would you rate the quality of service you received?**

4 Excellent                      3 Good                      2 Fair (or moderate)                      1 Poor

### **2. Did you get the kind of service you wanted?**

1 No, definitely not                      2 No, not really                      3 Yes, generally                      4 Yes, definitely

### **3. To what extent has the service met your needs?**

4 Almost all of my needs have been met                      3 Most of my needs have been met                      2 Only a few of my needs have been met                      1 None of my needs have been met

### **4. If a friend were pregnant, would you recommend the service to her?**

1 No, definitely not                      2 No, I don't think so                      3 Yes, I think so                      4 Yes, definitely

### **5. How satisfied are you with the amount of help you received?**

1 Quite dissatisfied                      2 Indifferent or mildly dissatisfied                      3 Mostly satisfied                      4 Very satisfied

### **6. How the services you received helped you to deal more effectively with your delivery?**

4 Yes, they helped a great deal                      3 Yes, they helped somewhat                      2 No, they really didn't help                      1 No, they seemed to make things worse

### **7. In an overall, general sense, how satisfied are you with the service you received?**

4 Very satisfied                      3 Mostly satisfied                      2 Indifferent or mildly dissatisfied                      1 Quite dissatisfied

### **8. If you were to seek help again, would you come back to the service?**

1 No, definitely not                      2 No, I don't think so                      3 Yes, I think so                      4 Yes, definitely
